# Supplementary material for: Synthesis, characterization and optical properties of polyvinyl alcohol–cerium oxide nanocomposite films
Source: Royal Society of Chemistry journal article supplement (doi:10.1039/c6ra11126b), 2016-01-01
Supplement: c6ra11126b1.pdf [file c6ra11126b1.pdf]

## Supplementary Figures

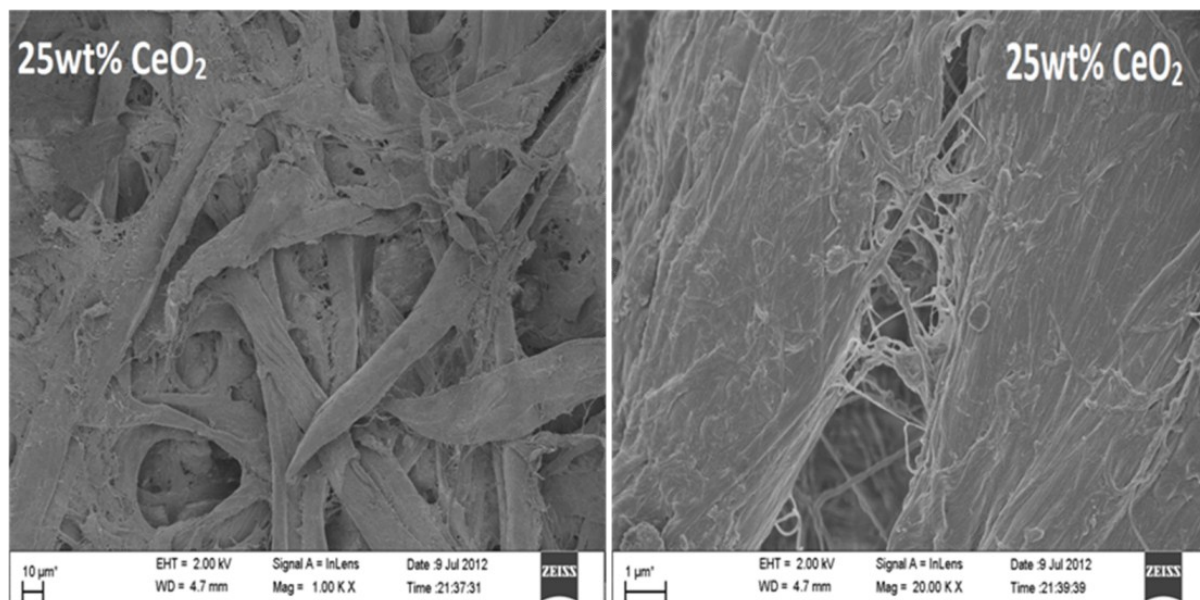

S1<sup>†</sup>: HRTEM images of PVA-25wt% CeO<sub>2</sub> nanocomposite film

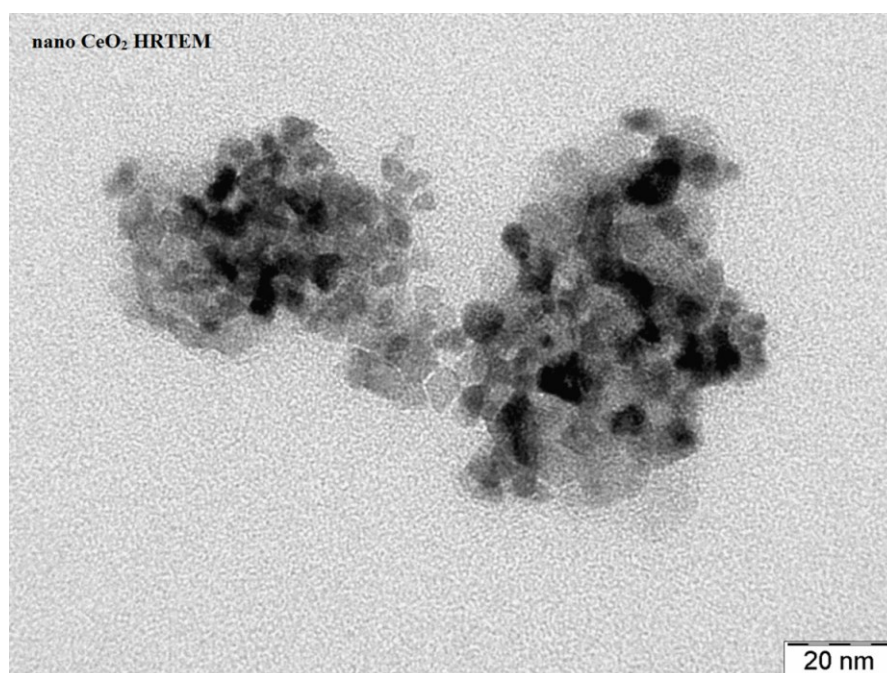

S2<sup>†</sup>: Cubic fluorite structure of nano CeO<sub>2</sub> from HRTEM

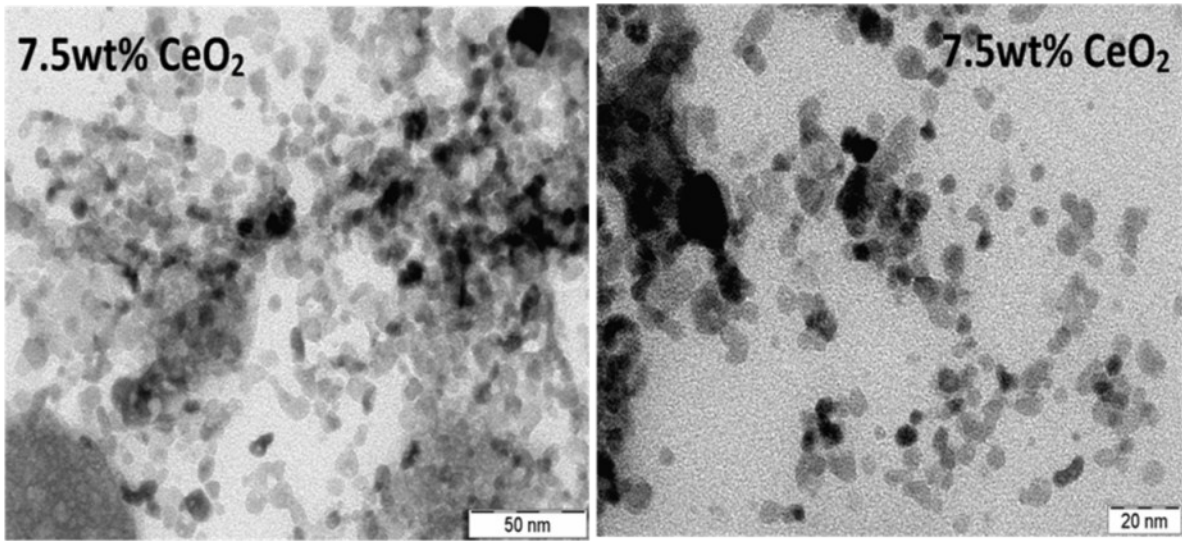

S3†: HRTEM images of PVA-7.5wt% CeO<sub>2</sub> nanocomposite film

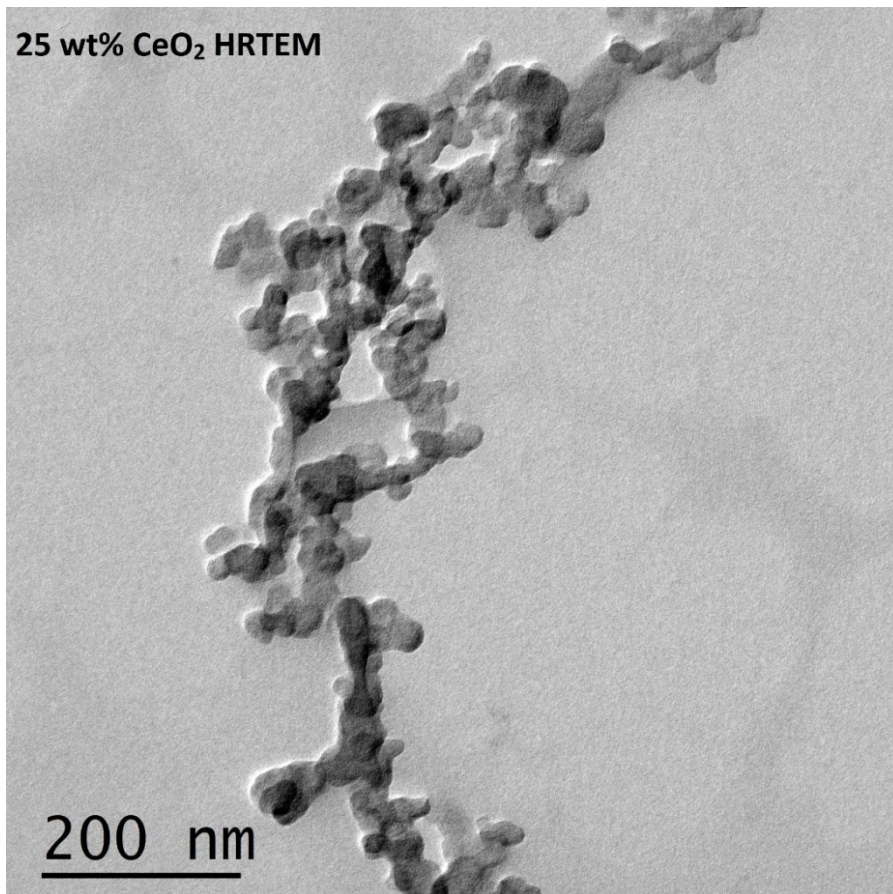

S4†: HRTEM image of PVA-25wt% CeO<sub>2</sub> nanocomposite film

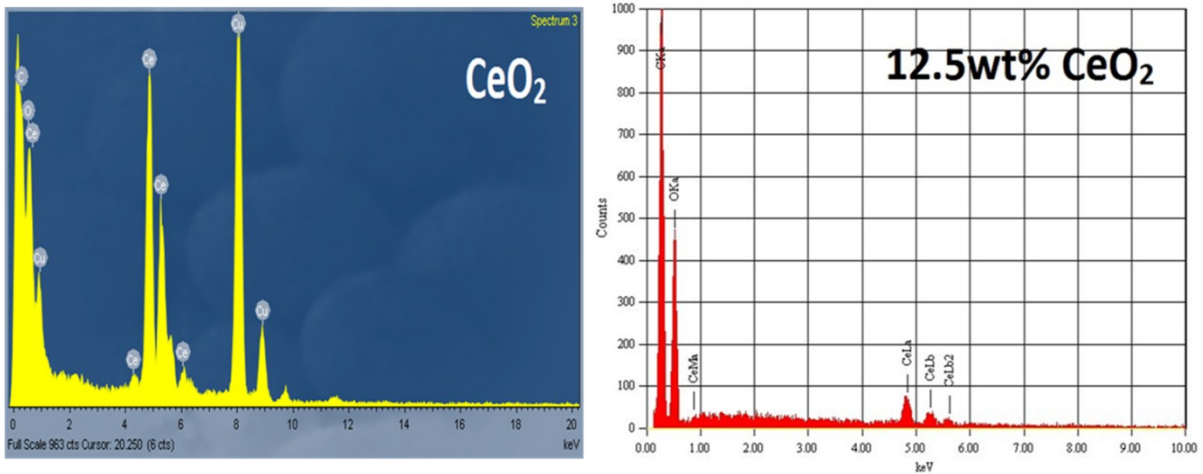

S5†: EDX spectra of (a) nano CeO<sub>2</sub> and (b) PVA-12.5wt% CeO<sub>2</sub> nanocomposite film

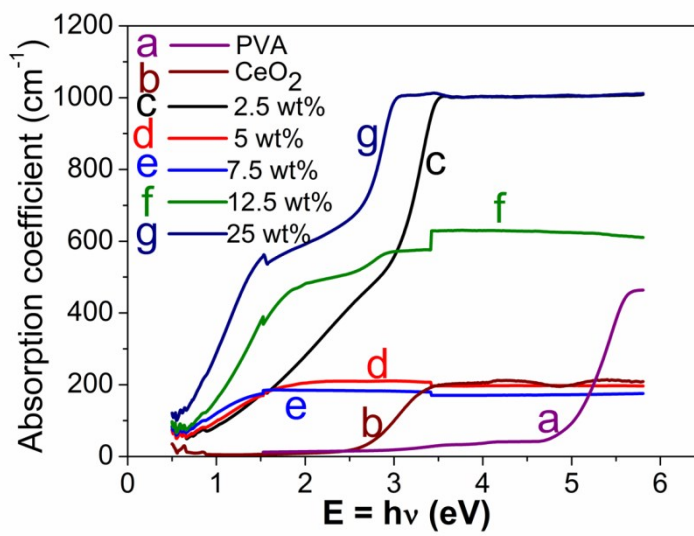

S6†: Absorption coefficient versus Energy graph of all the samples

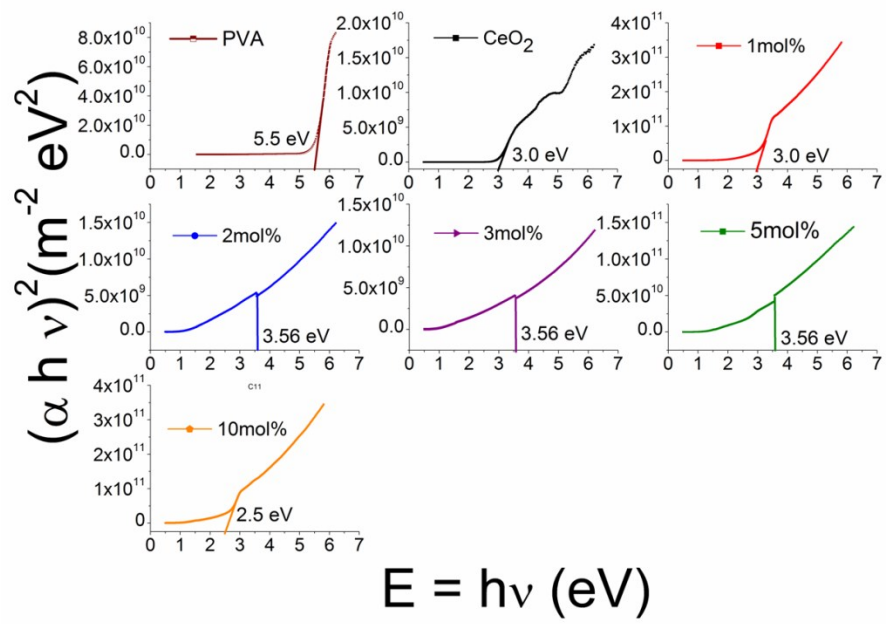

S7†: Direct band gap of pure PVA, nano CeO<sub>2</sub> and composite films
